# Supplementary material
Source: publisher figshare collection journal article supplement (https://gsajournals.figshare.com/articles/dataset/_/11295944)

# Systolic blood pressure

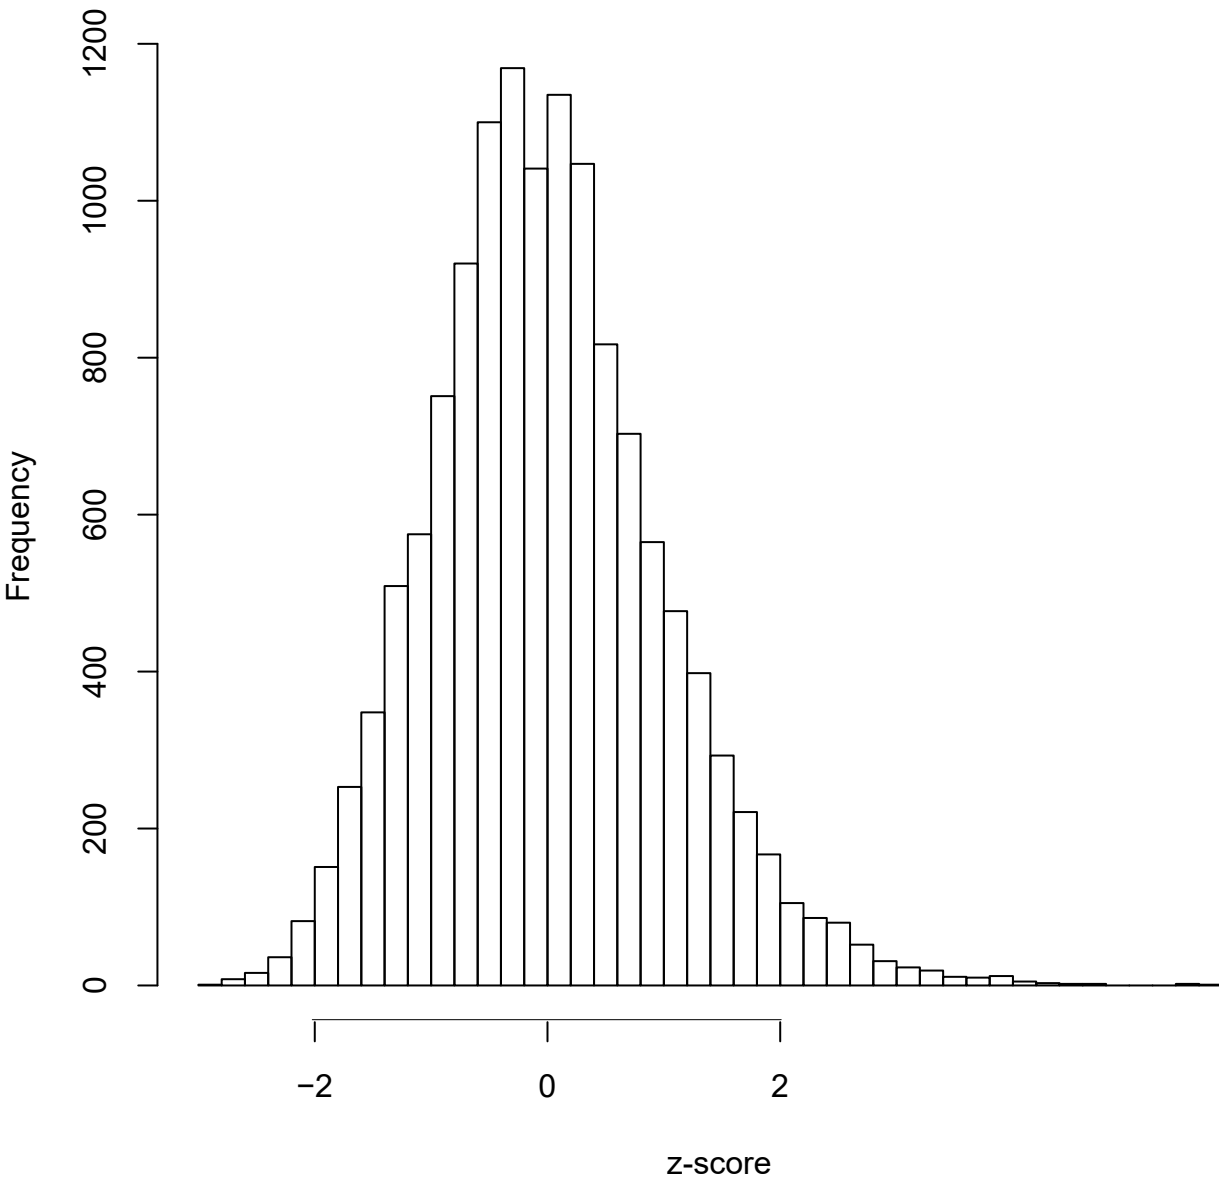

# Diastolic blood pressure

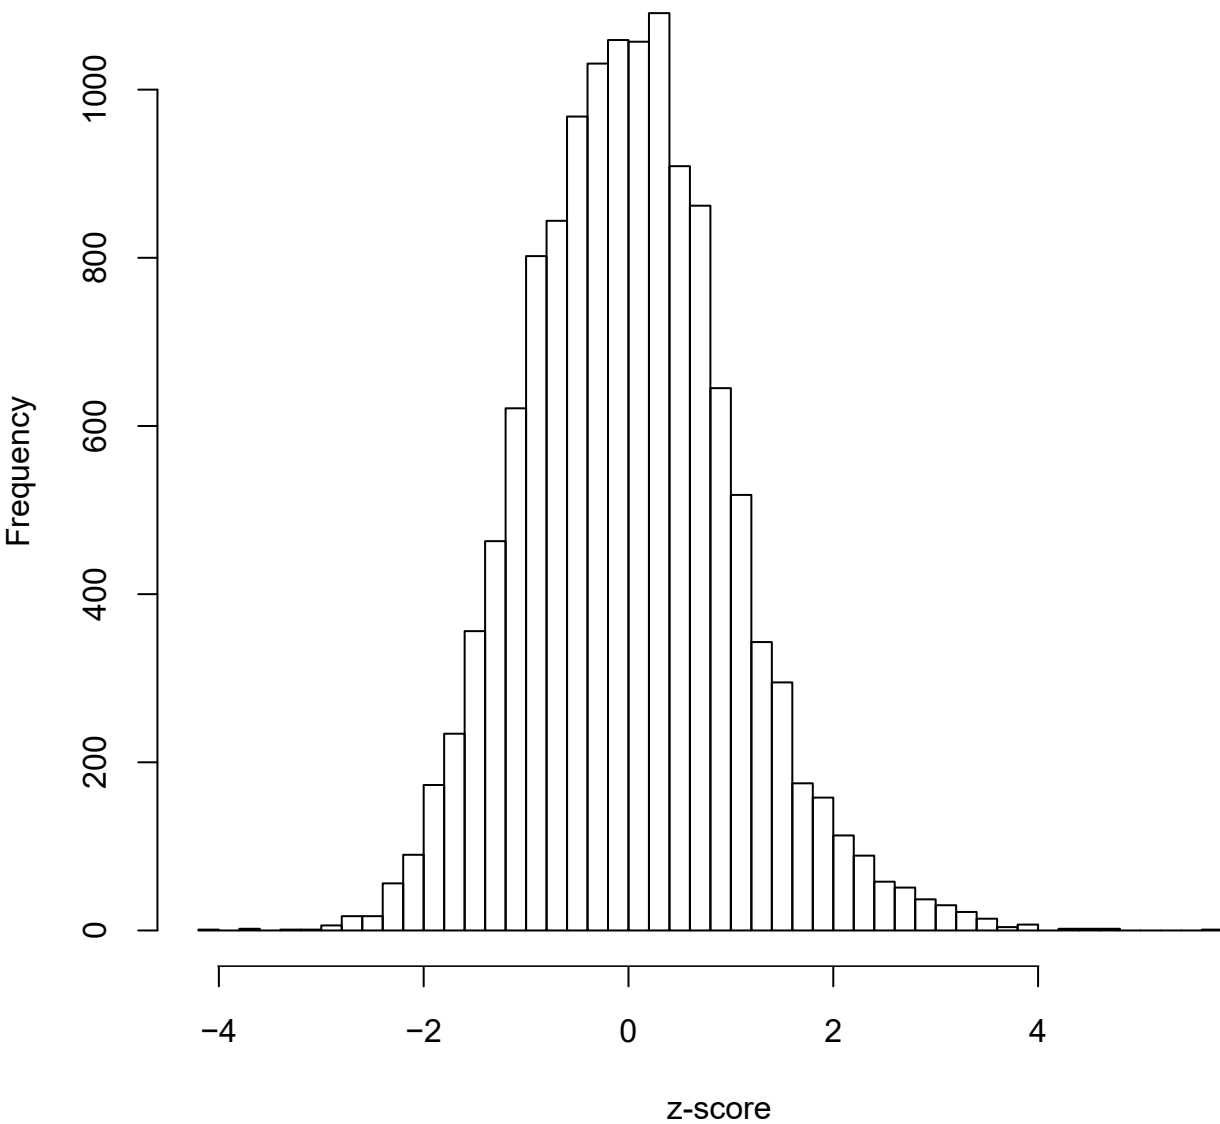

# Triglycerides

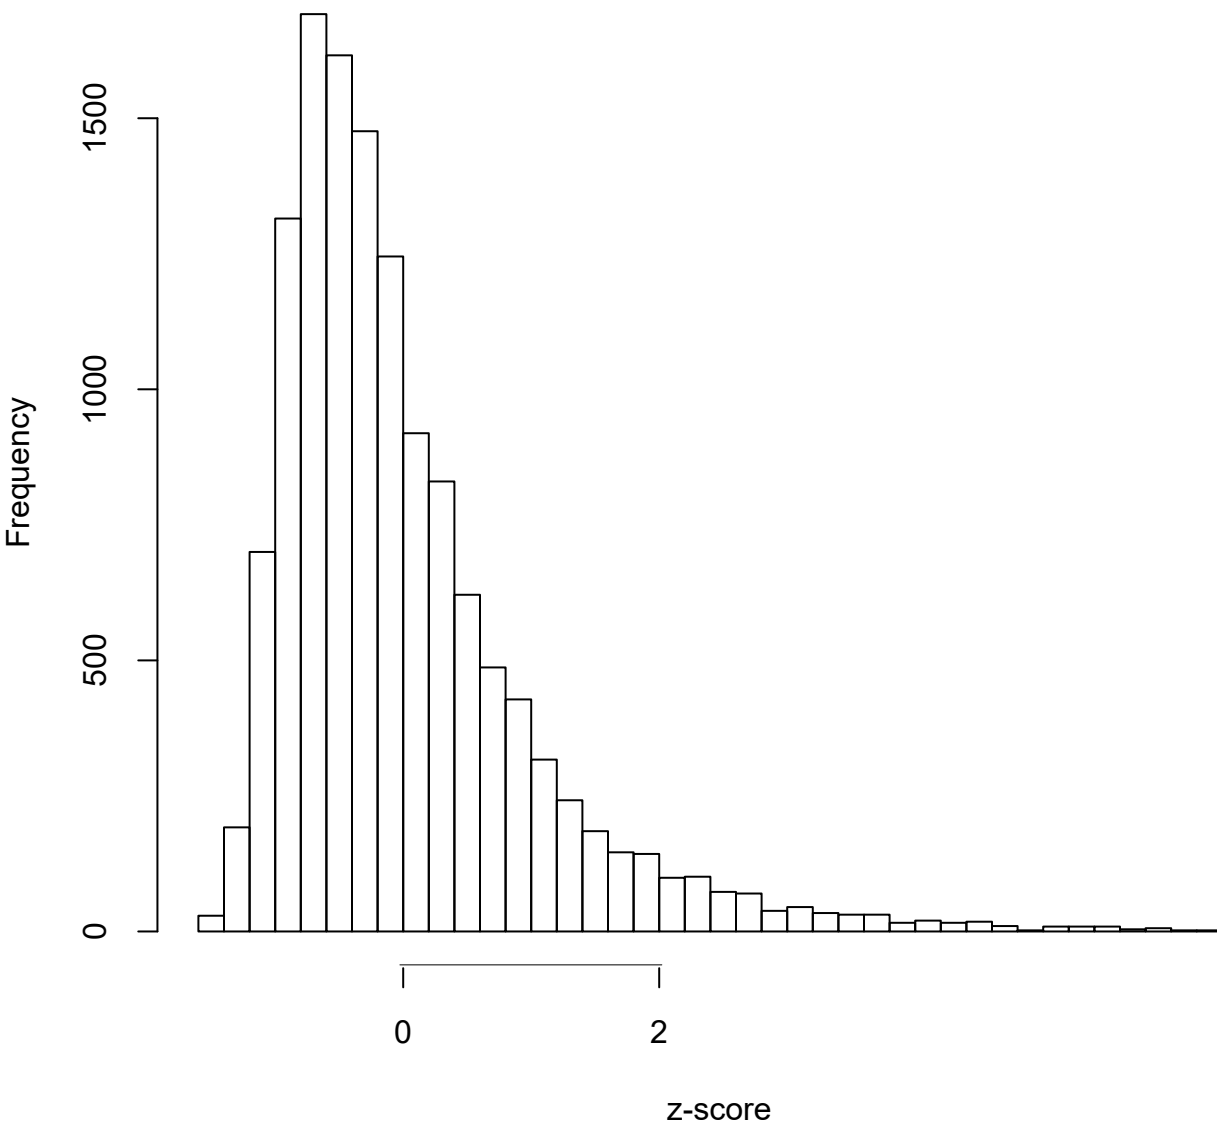

# HDL cholesterol

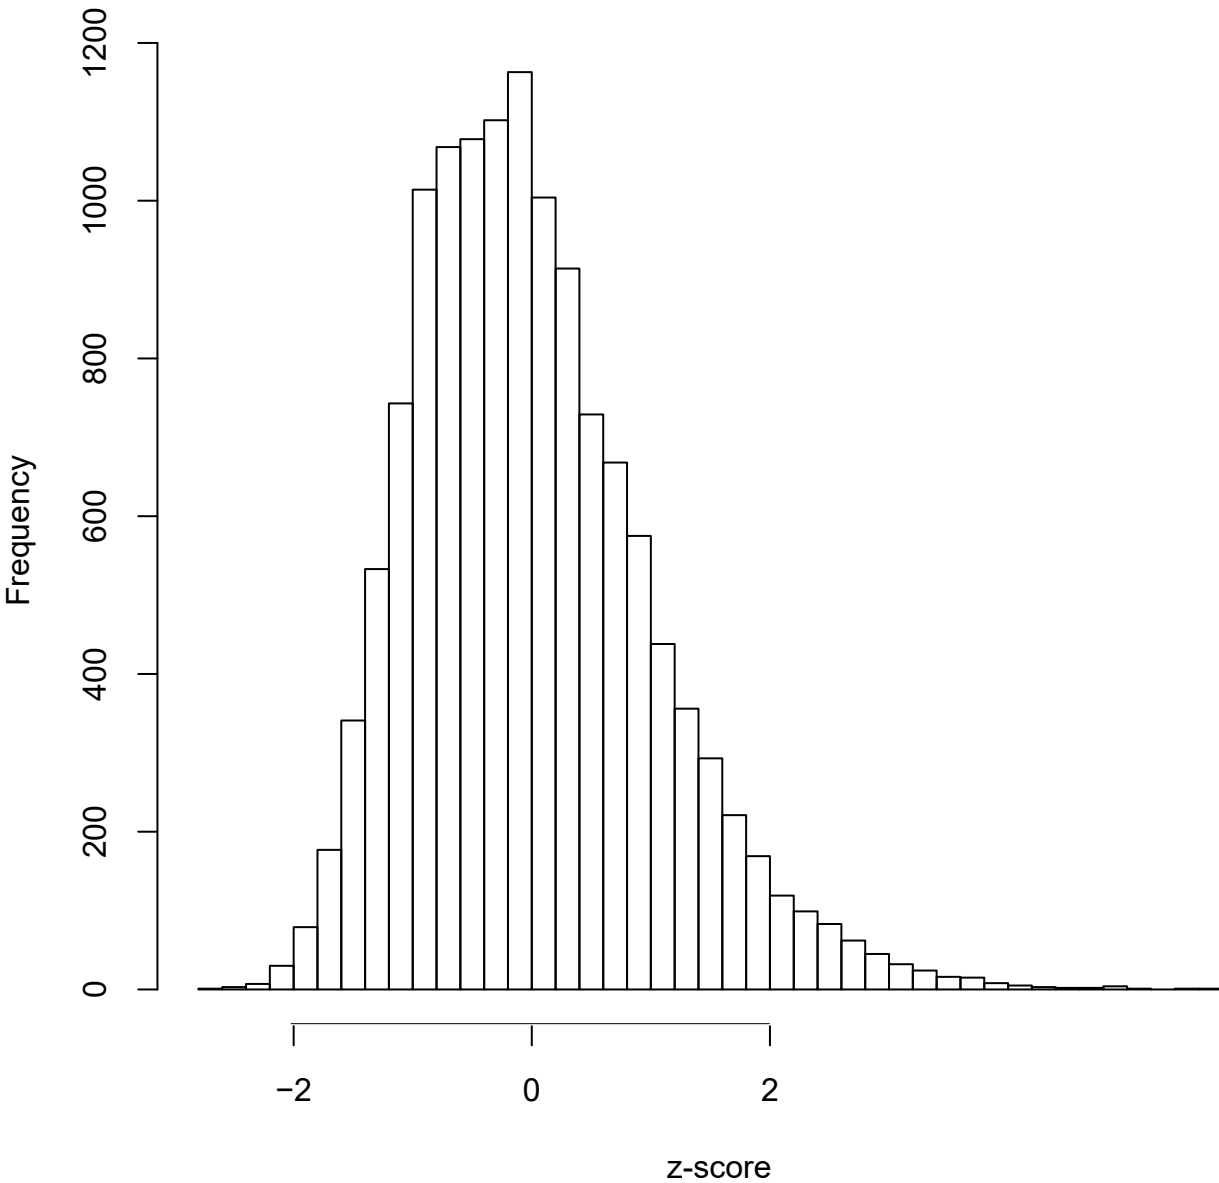

# Height

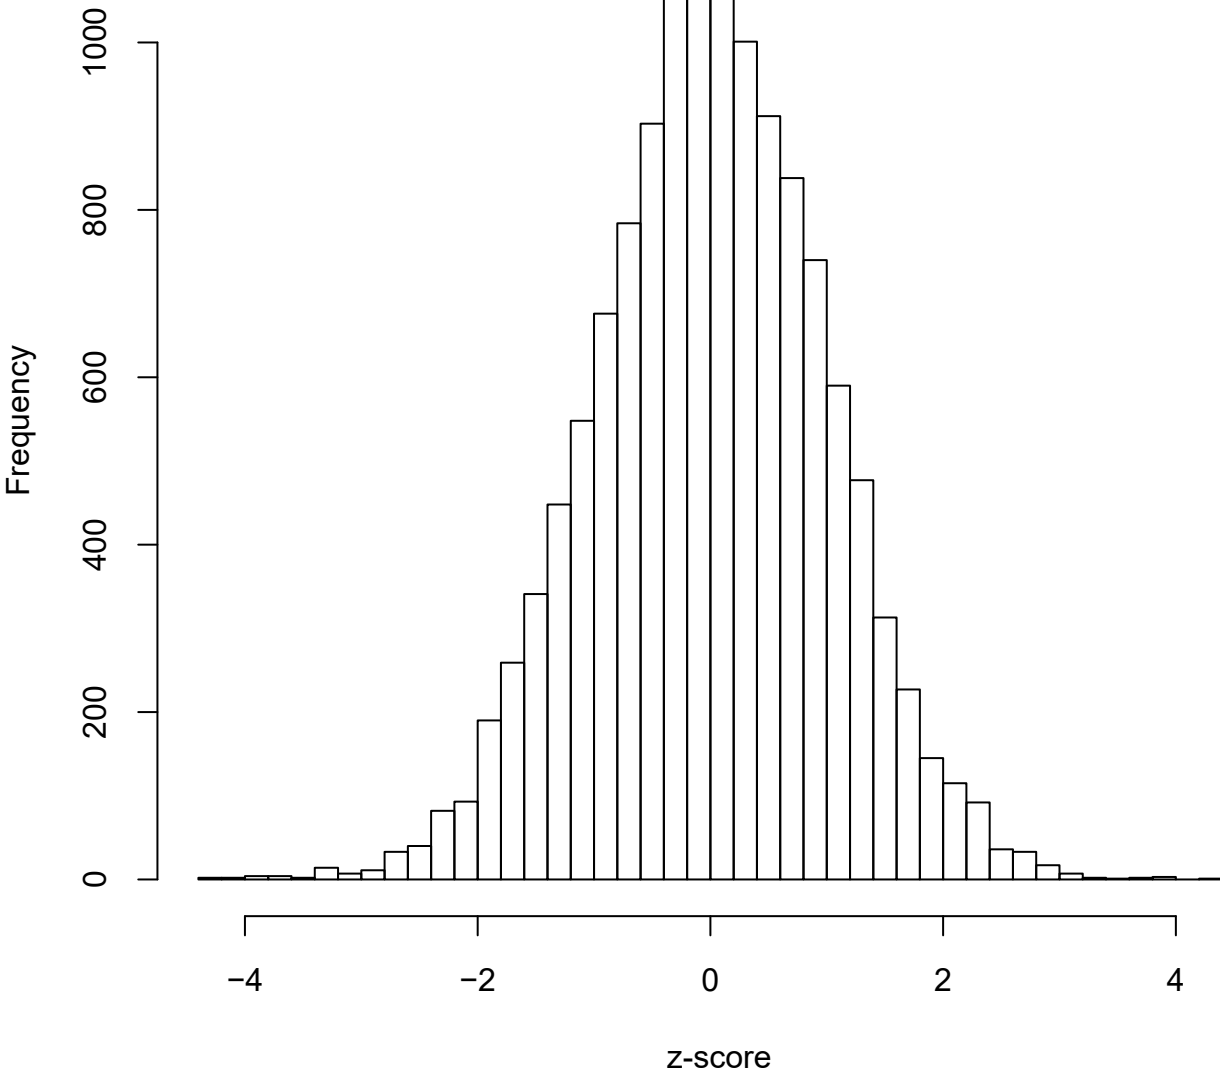

# Weight

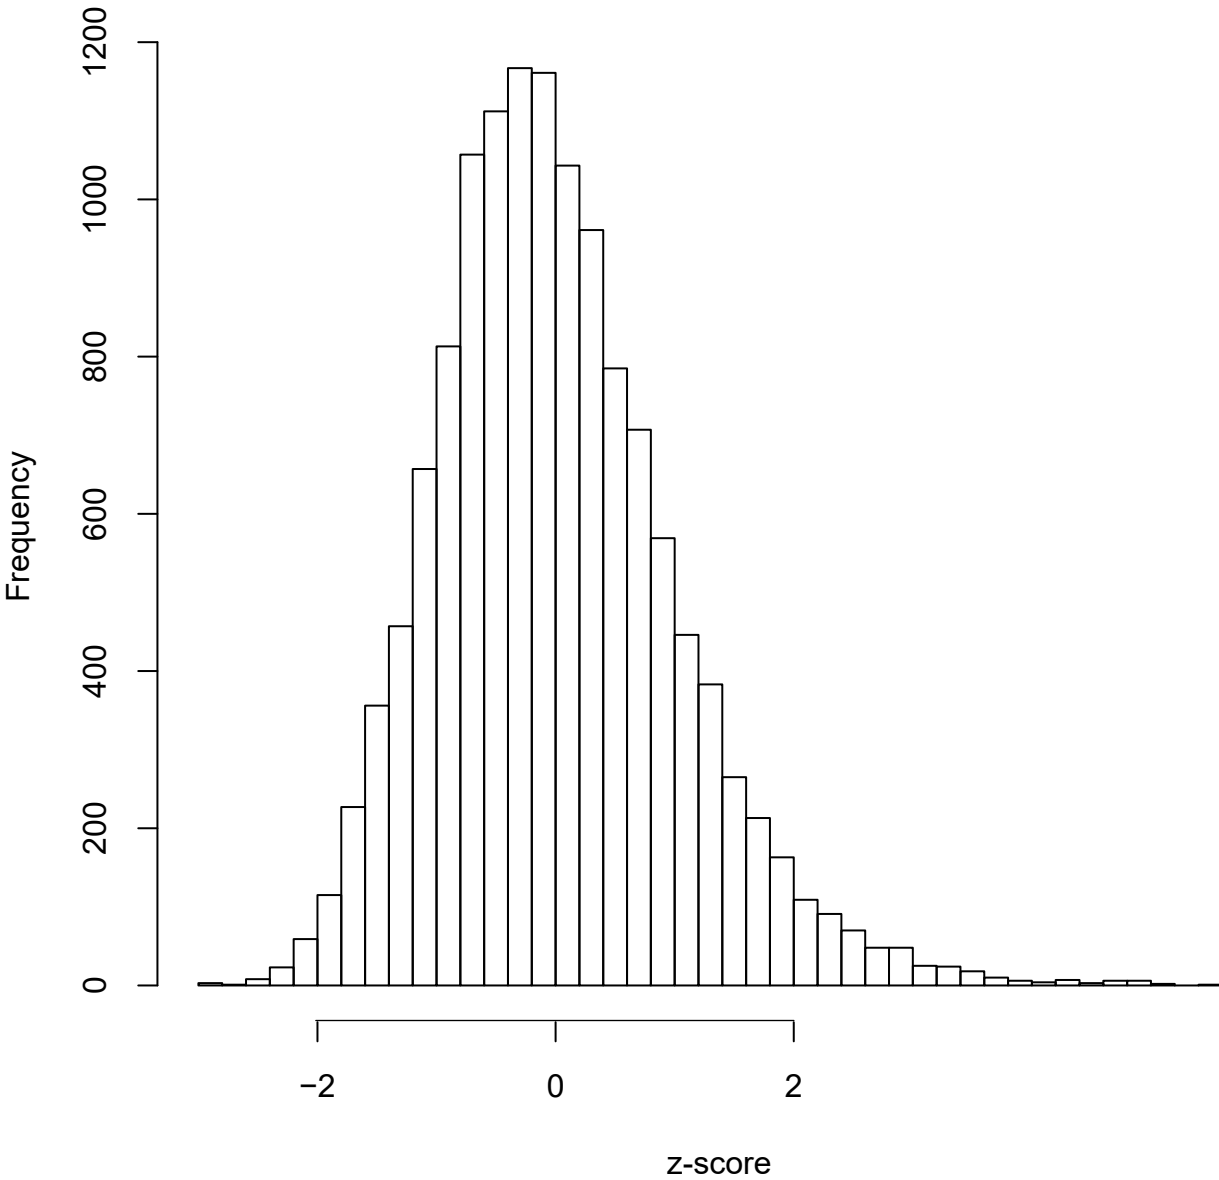

# BMI

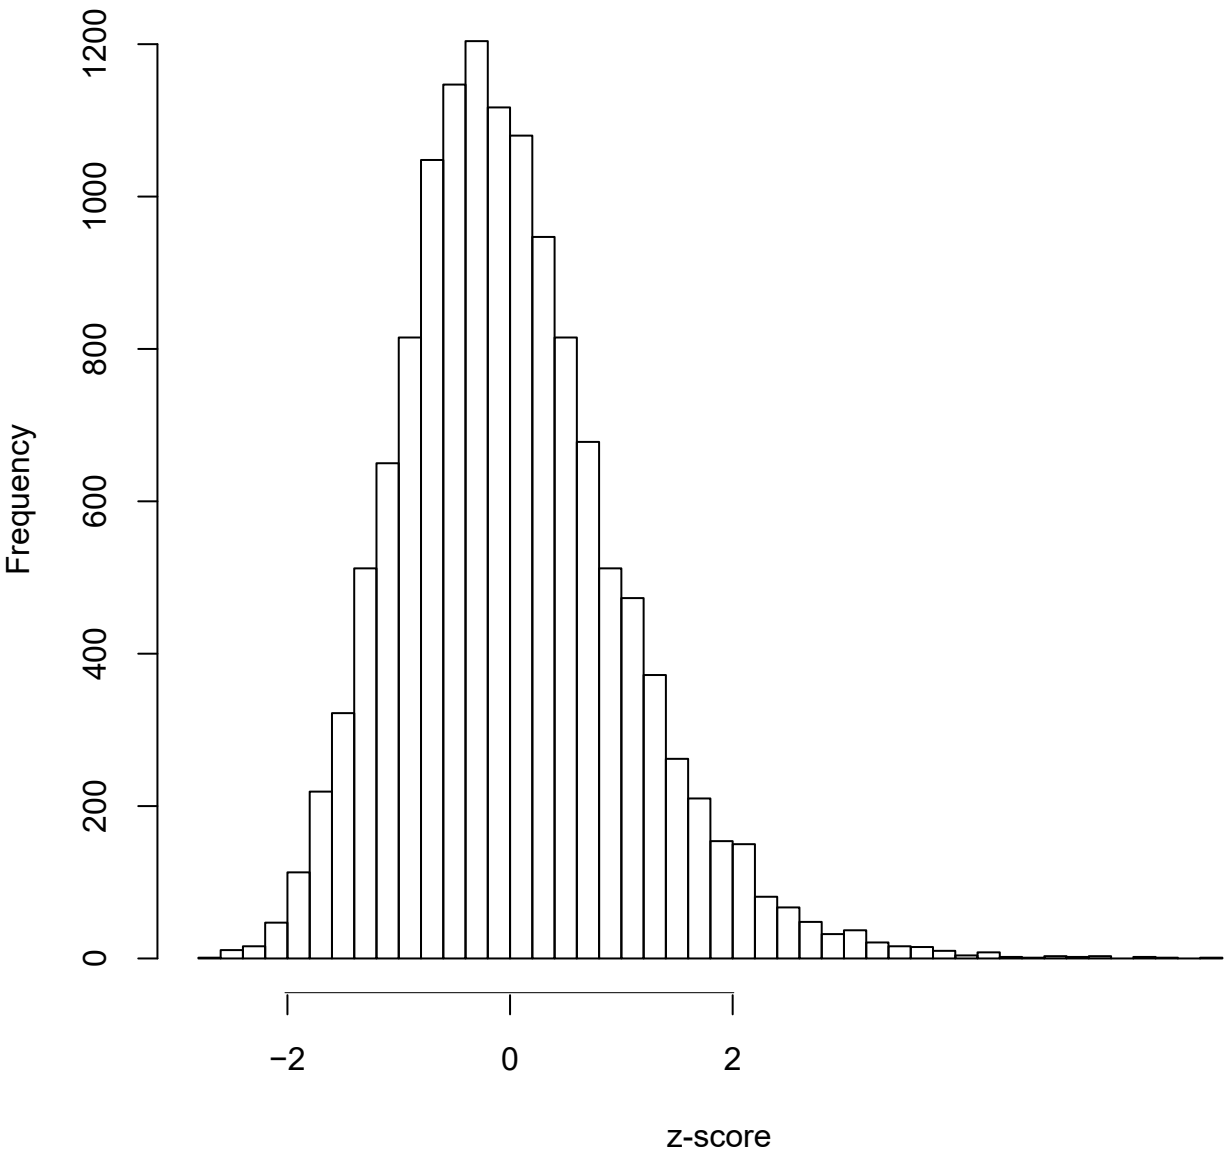

# Waist circumference

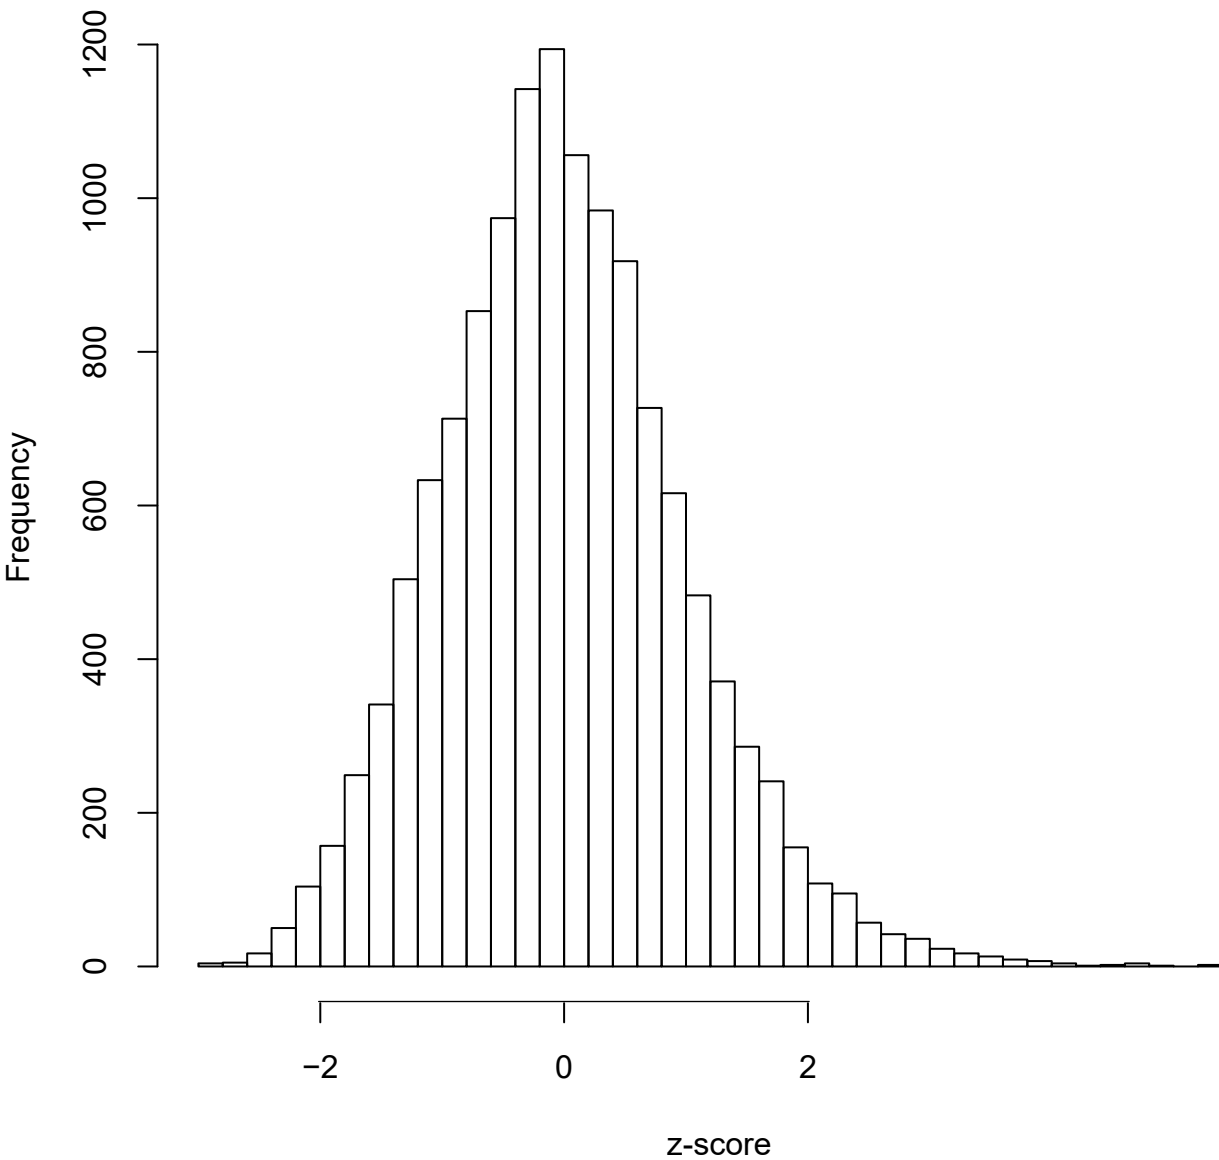



# Waist-to-height ratio

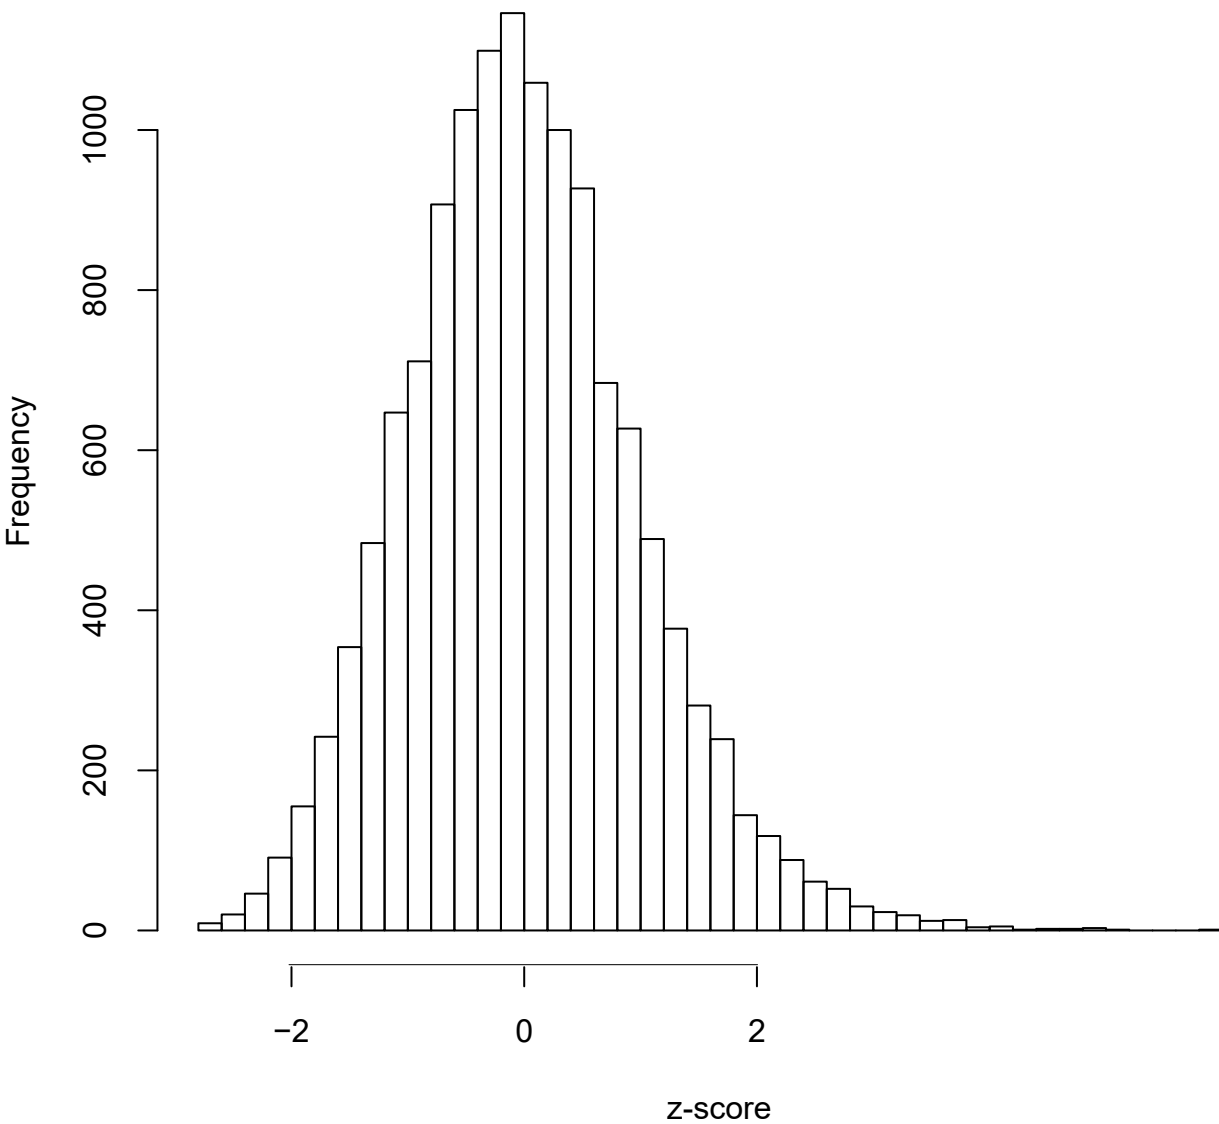

# Urine creatinine

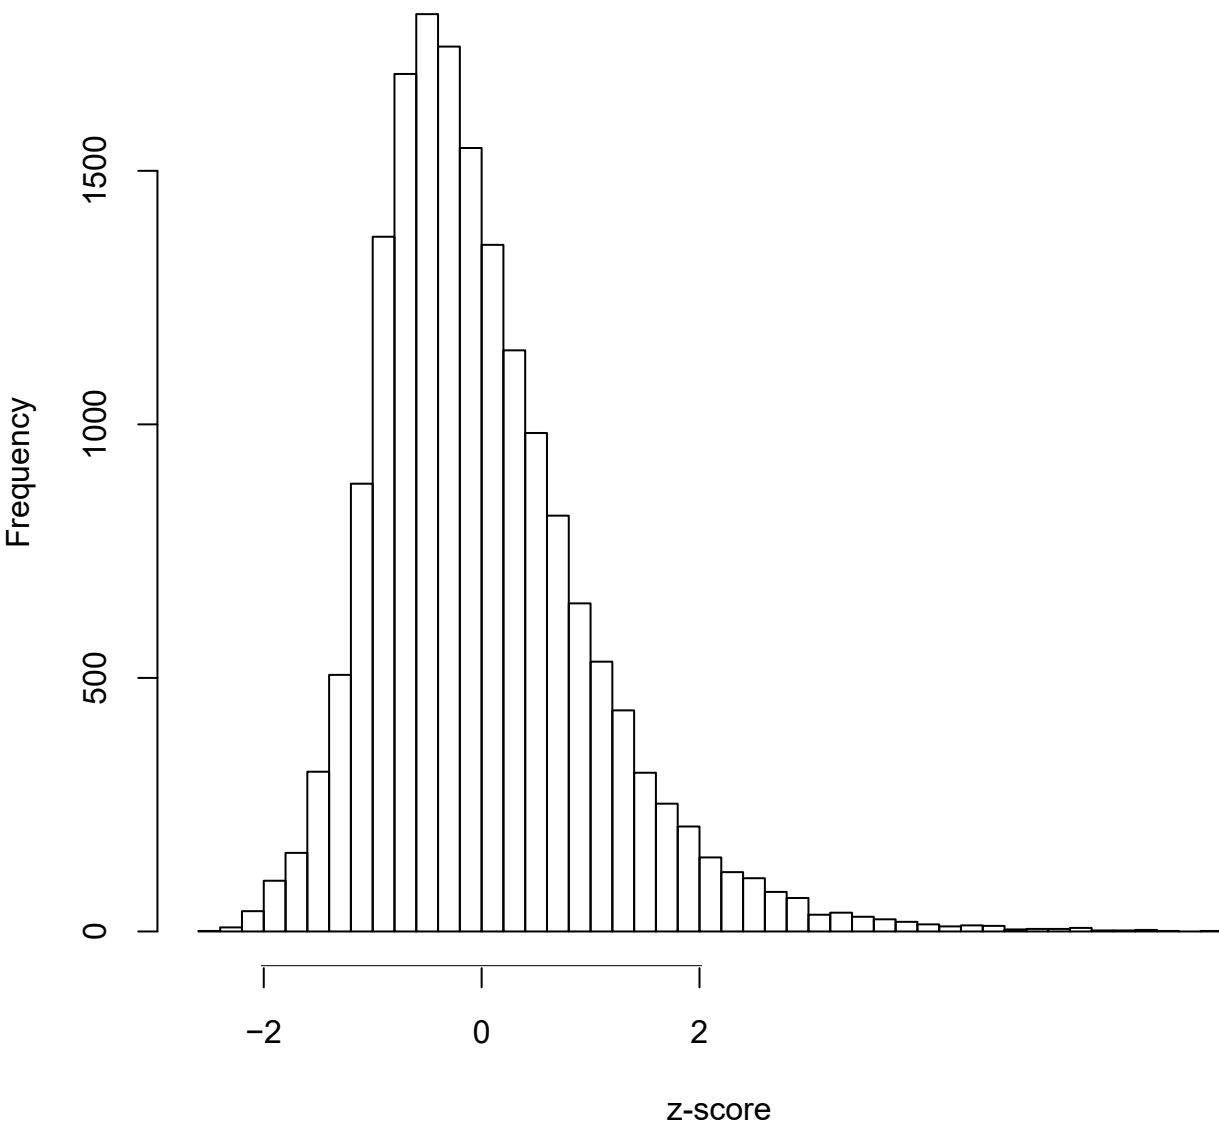

# Urine chloride

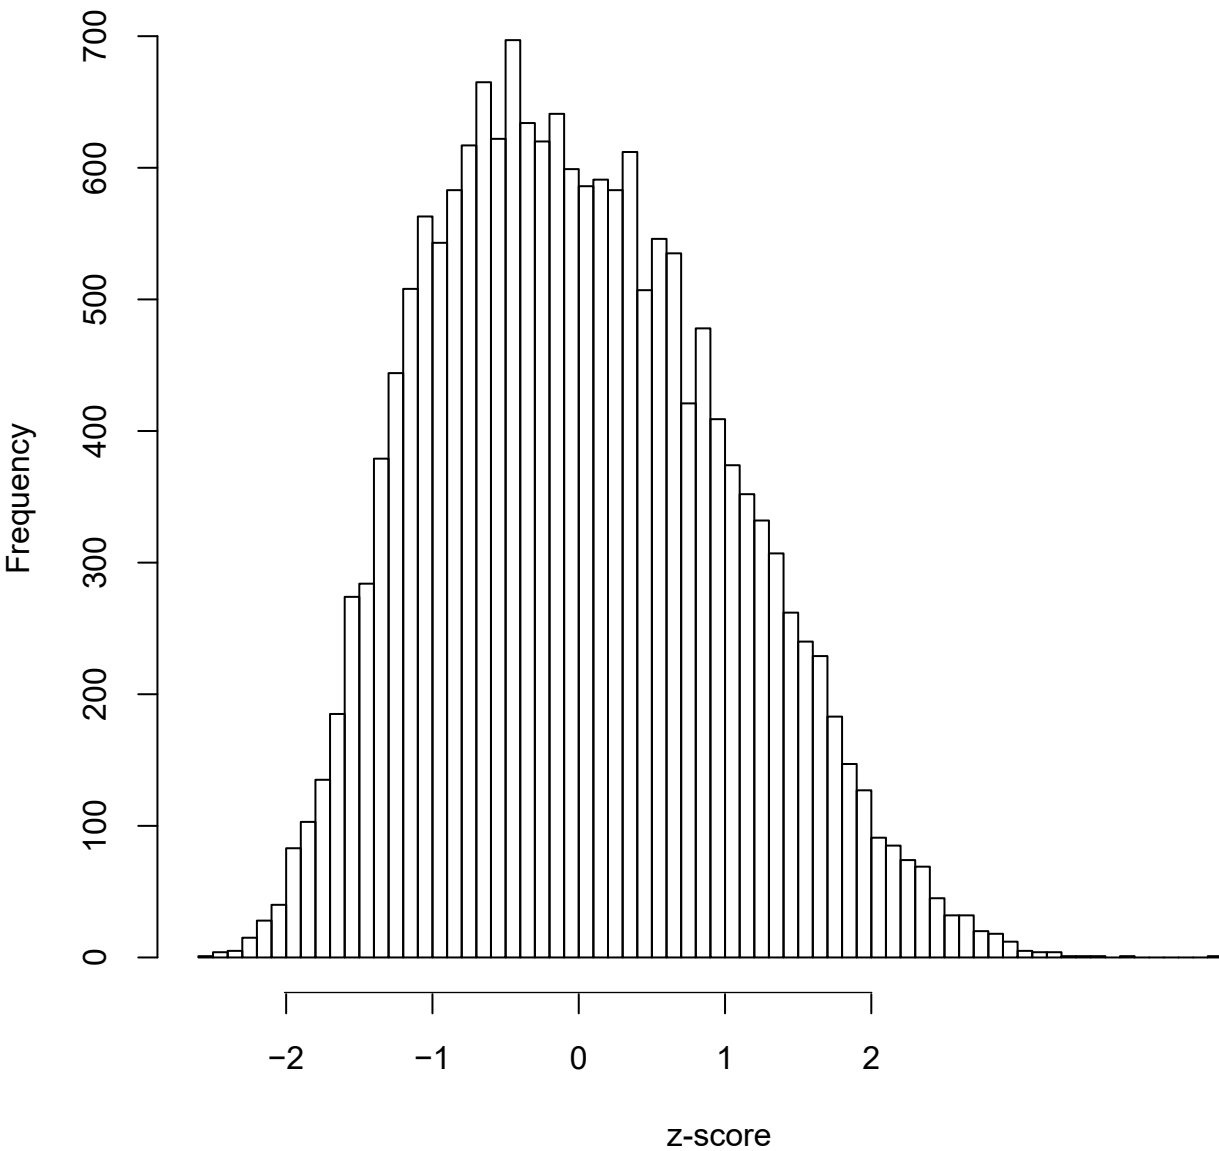

# Urine potassium

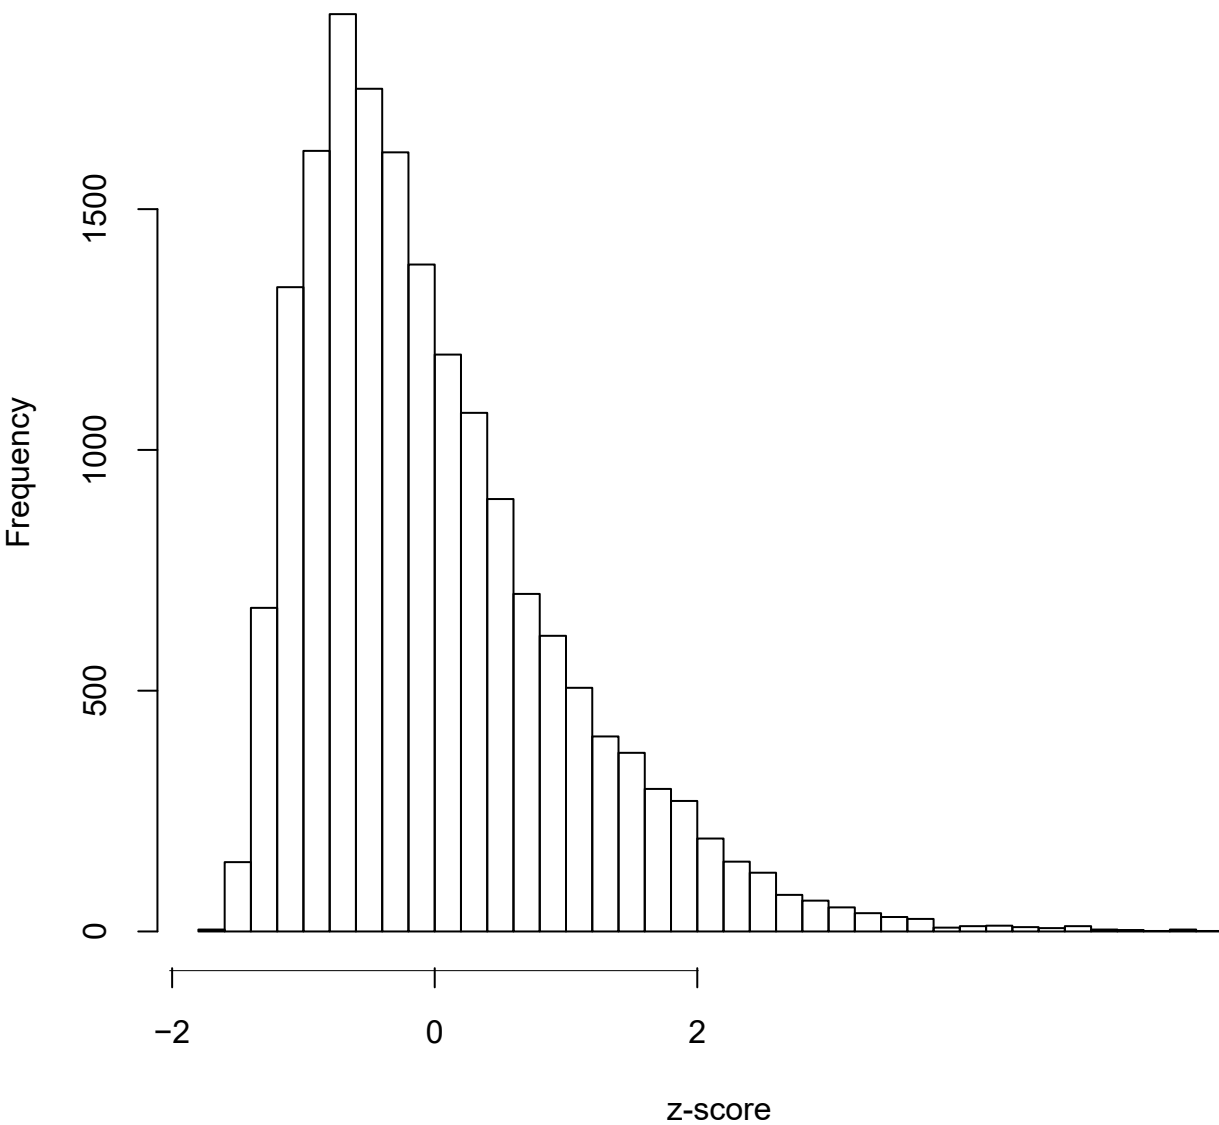

# Serum cystatin C

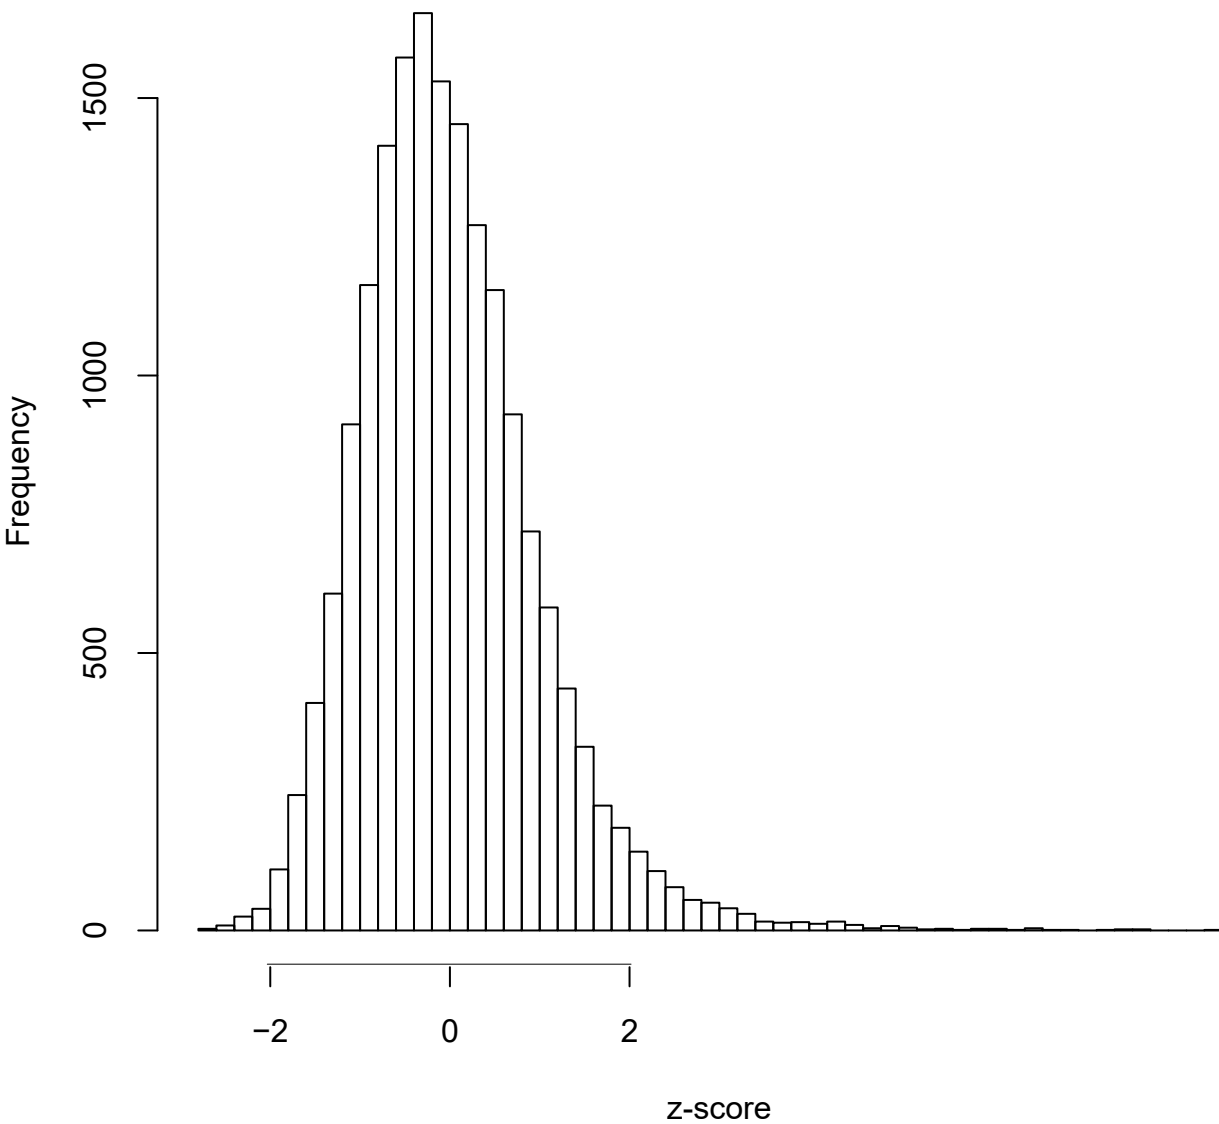

# Serum creatinine

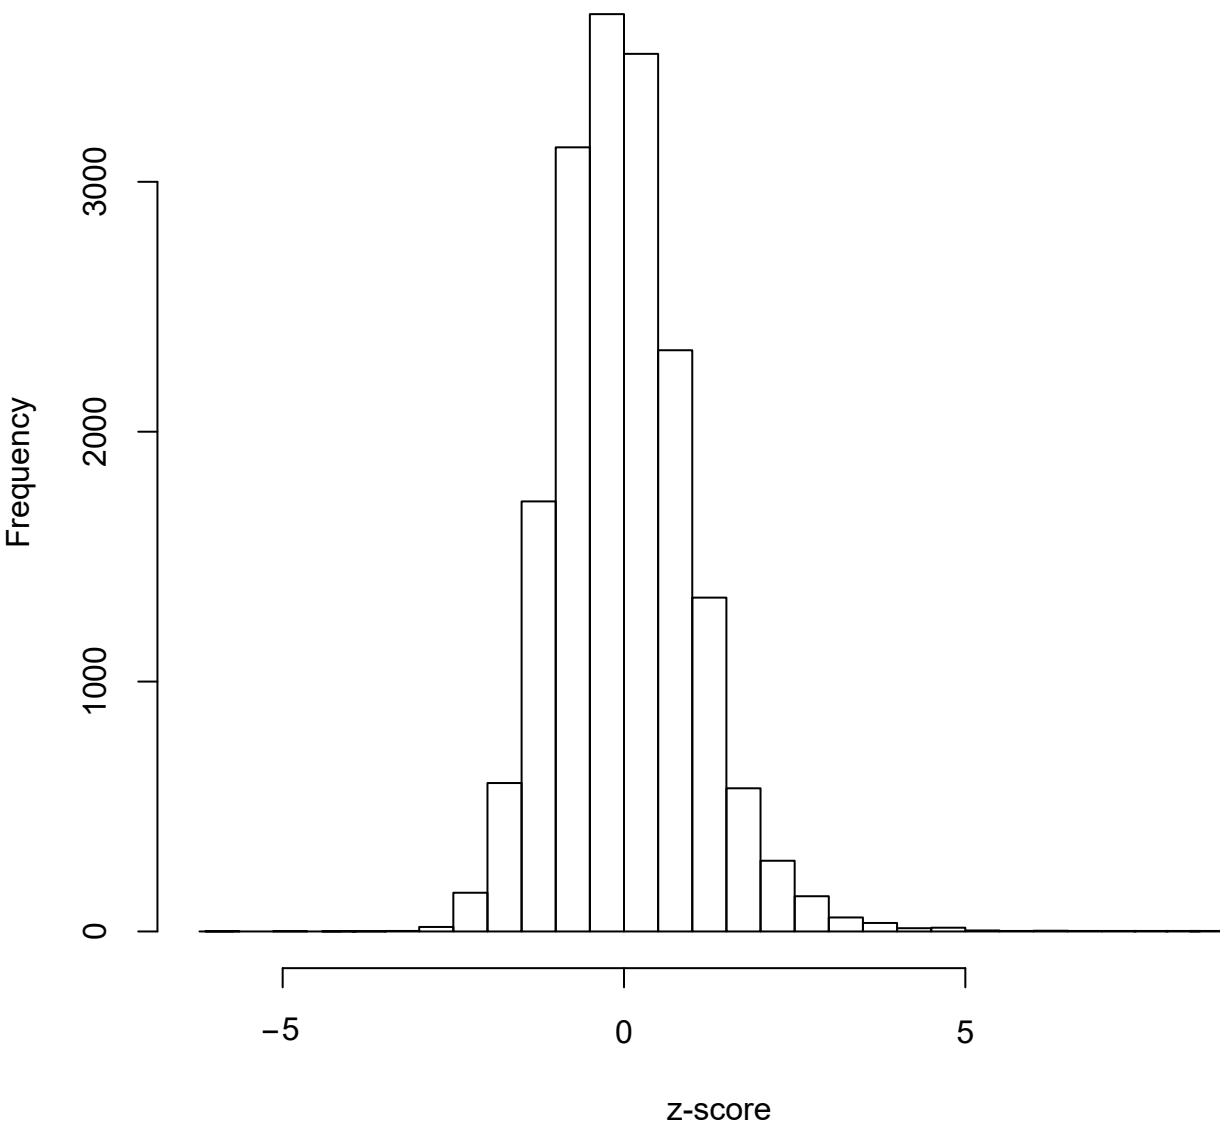

# Serum uric acid

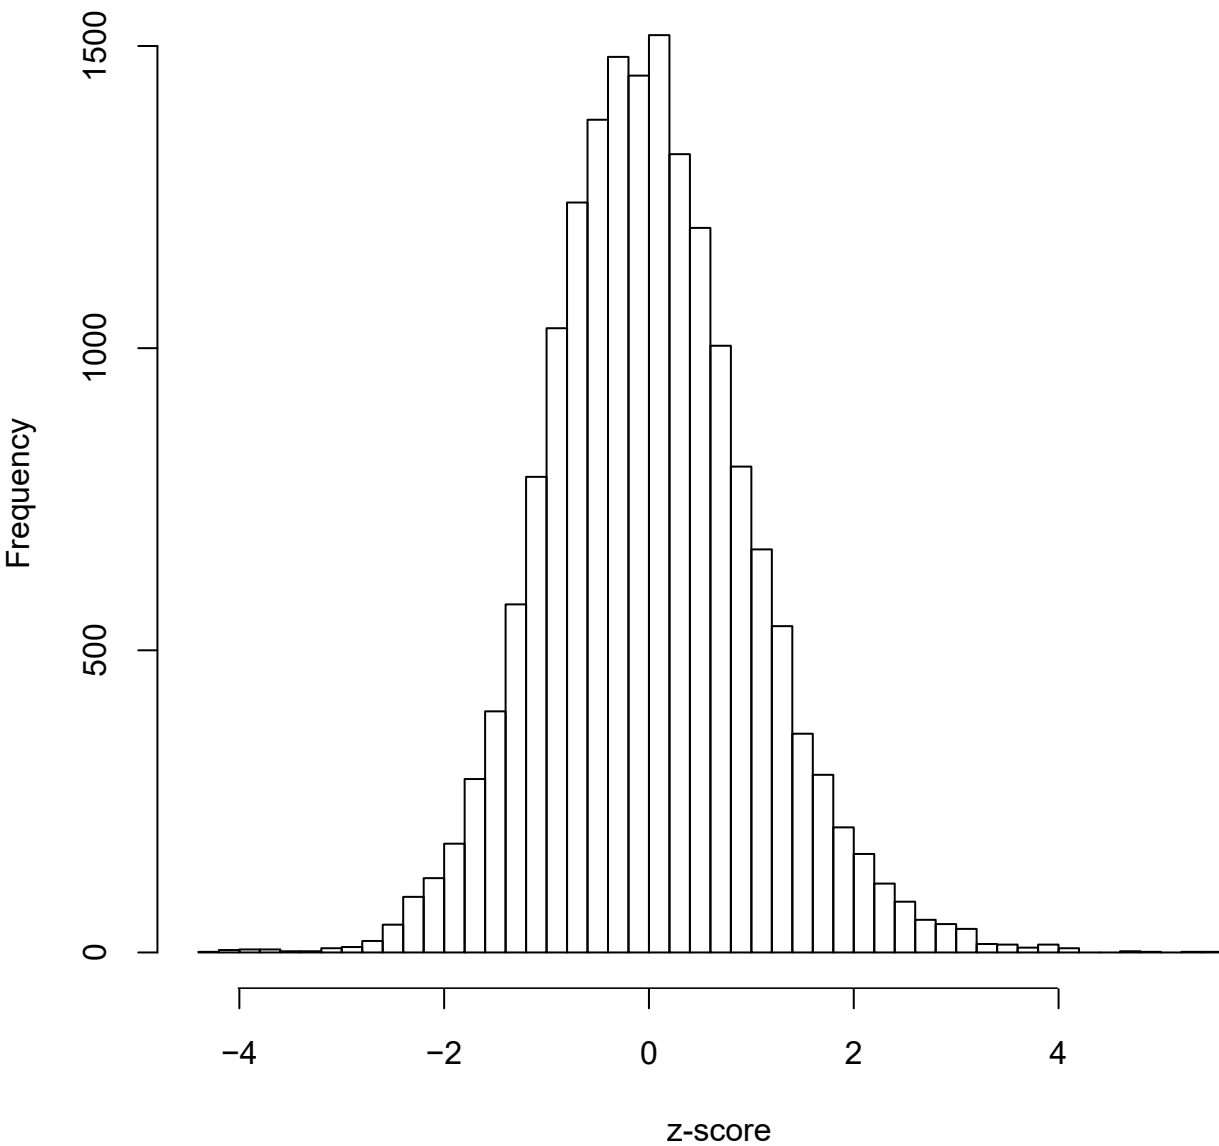

# Blood urea nitrogen

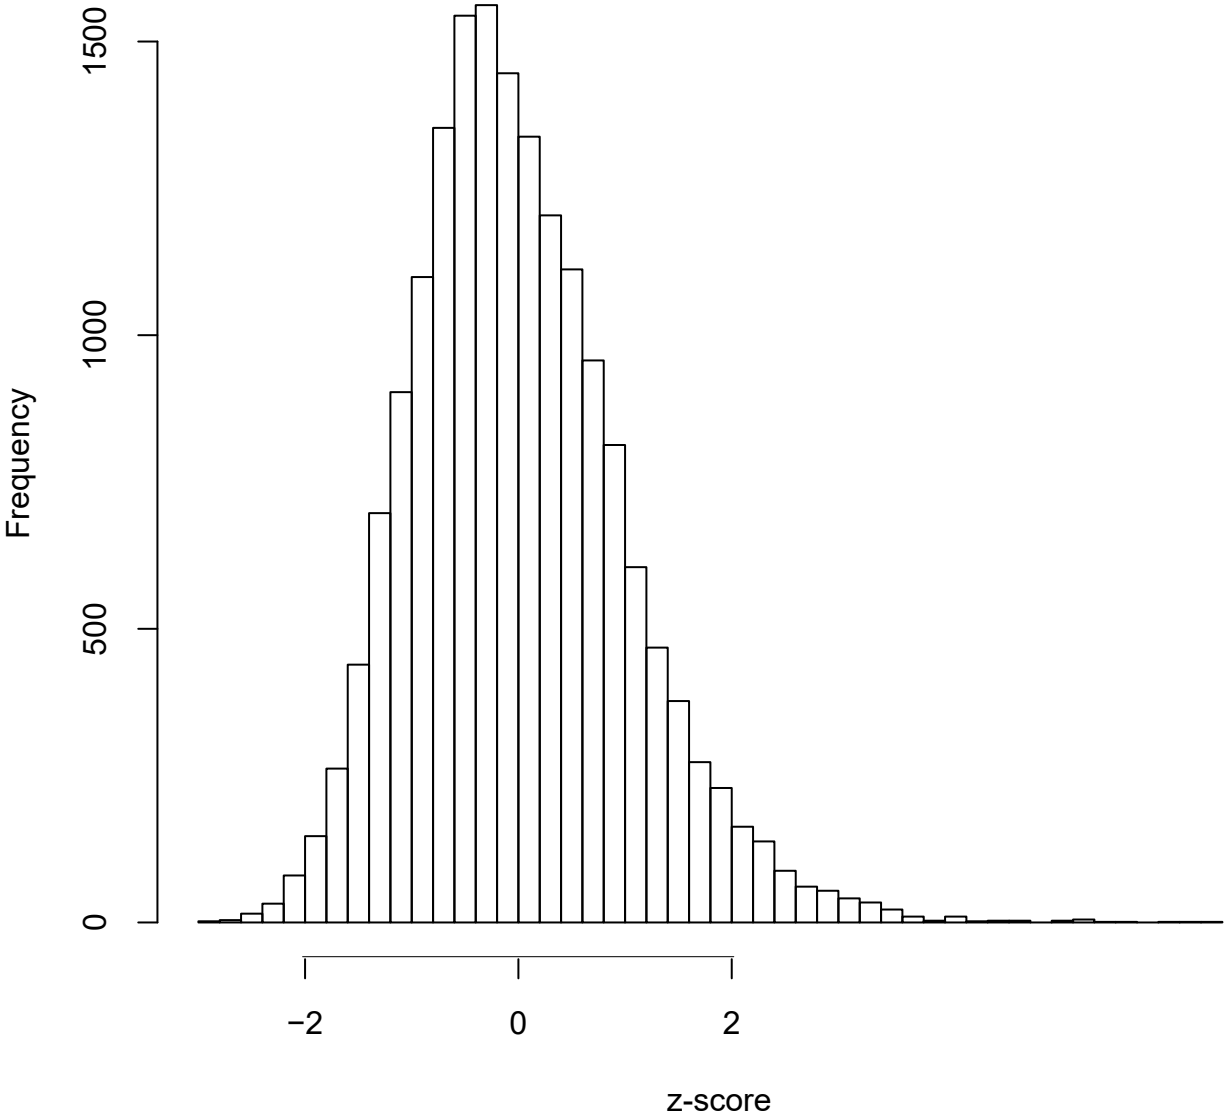



# Hemoglobin

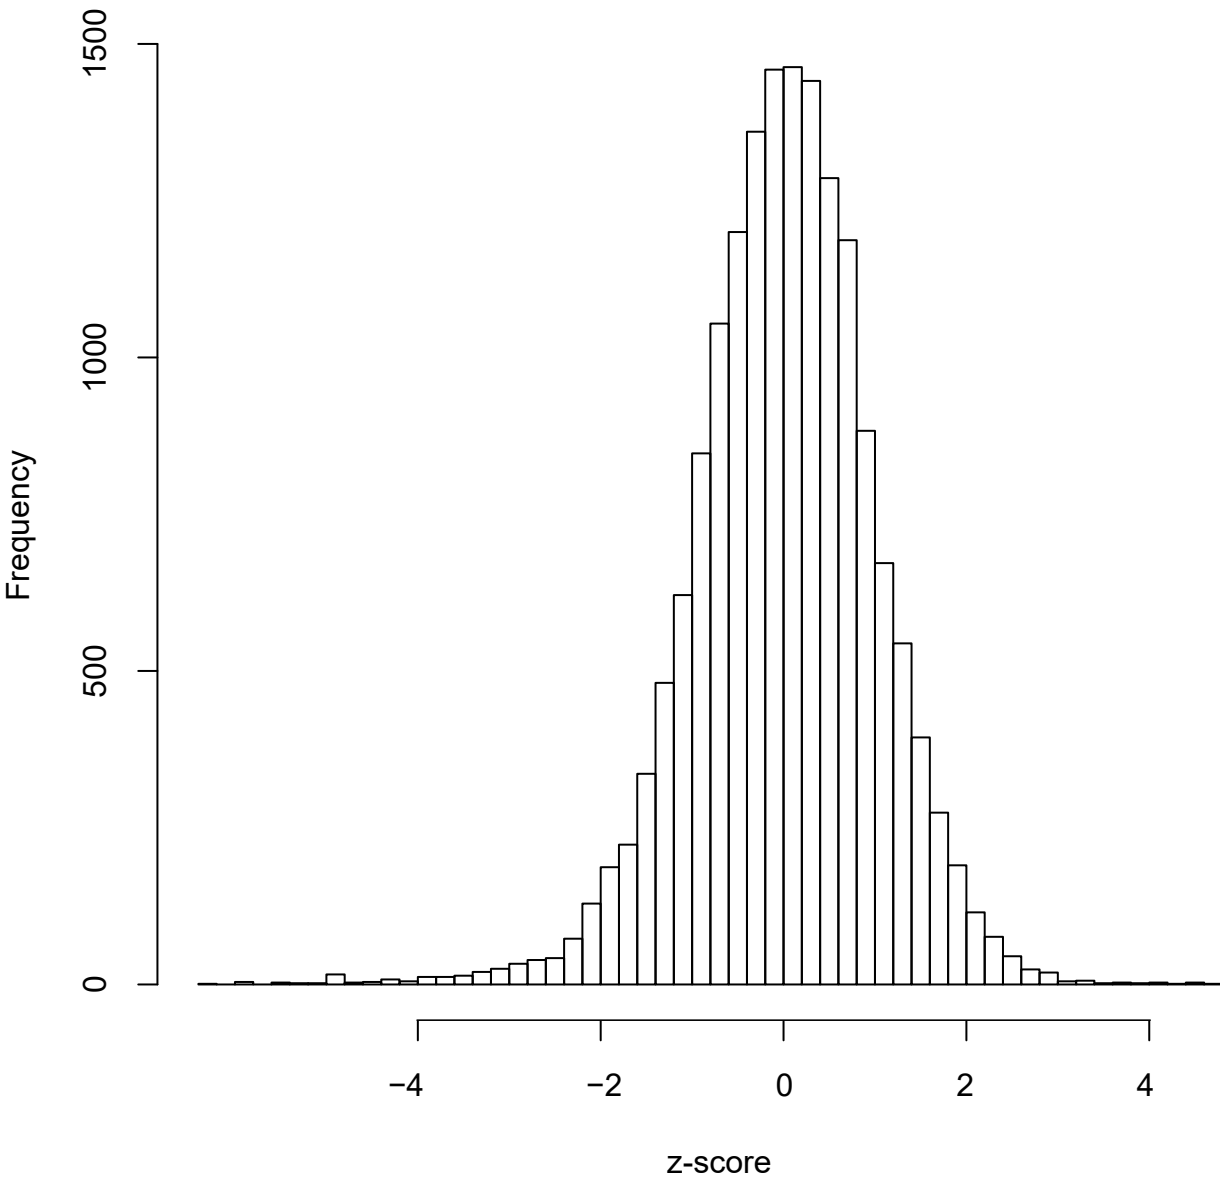

Supplement: Supplementary file 1 [file 1]
